# Supplementary material
Source: PubMed Central journal article supplement (PMC7367750)

## Supplemental Figure Legends

**Figure S1.** Immunohistochemical stains for PDCD1 showing: **A)** absence of expression in tumor; **B)** expression in lymphoid cells in a reactive lymph node (concurrently stained positive control)

**Figure S2.** Ploidy and purity corrected clustering of somatic copy number alterations, annotated with frequently altered genes and WGD status.

**Figure S3.** **A)** Tumor mutational burden split by histology. **B)** MSIsensor scores. Scores above ten are considered MSI-H. **C)** Signature decomposition of hypermutated cases. Number of SNVs indicates the number of single nucleotide variants used in the decomposition.

S1A

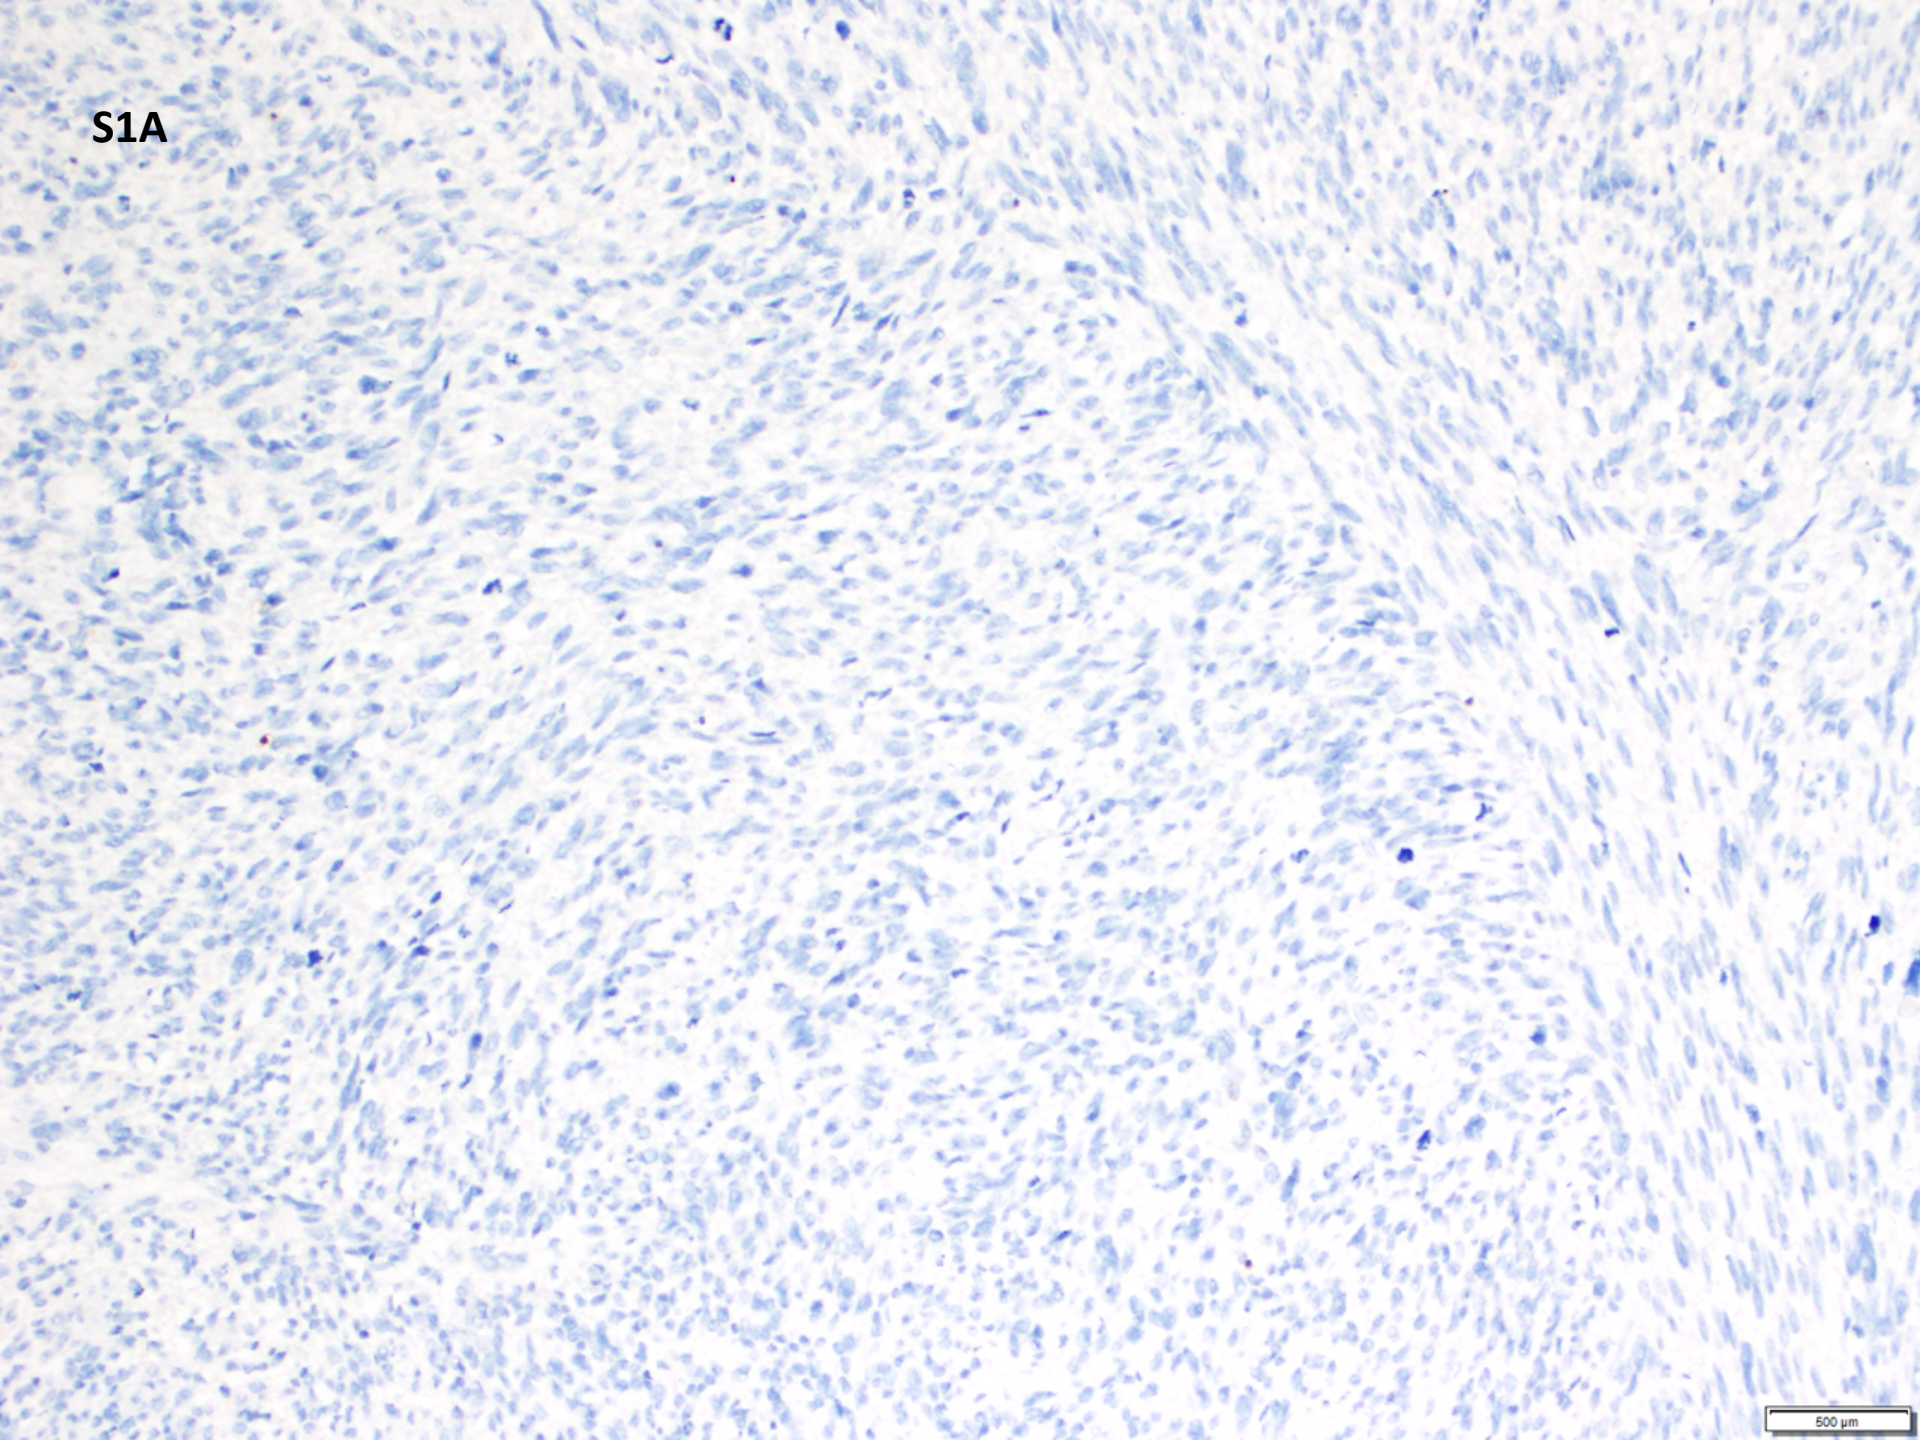

S1B

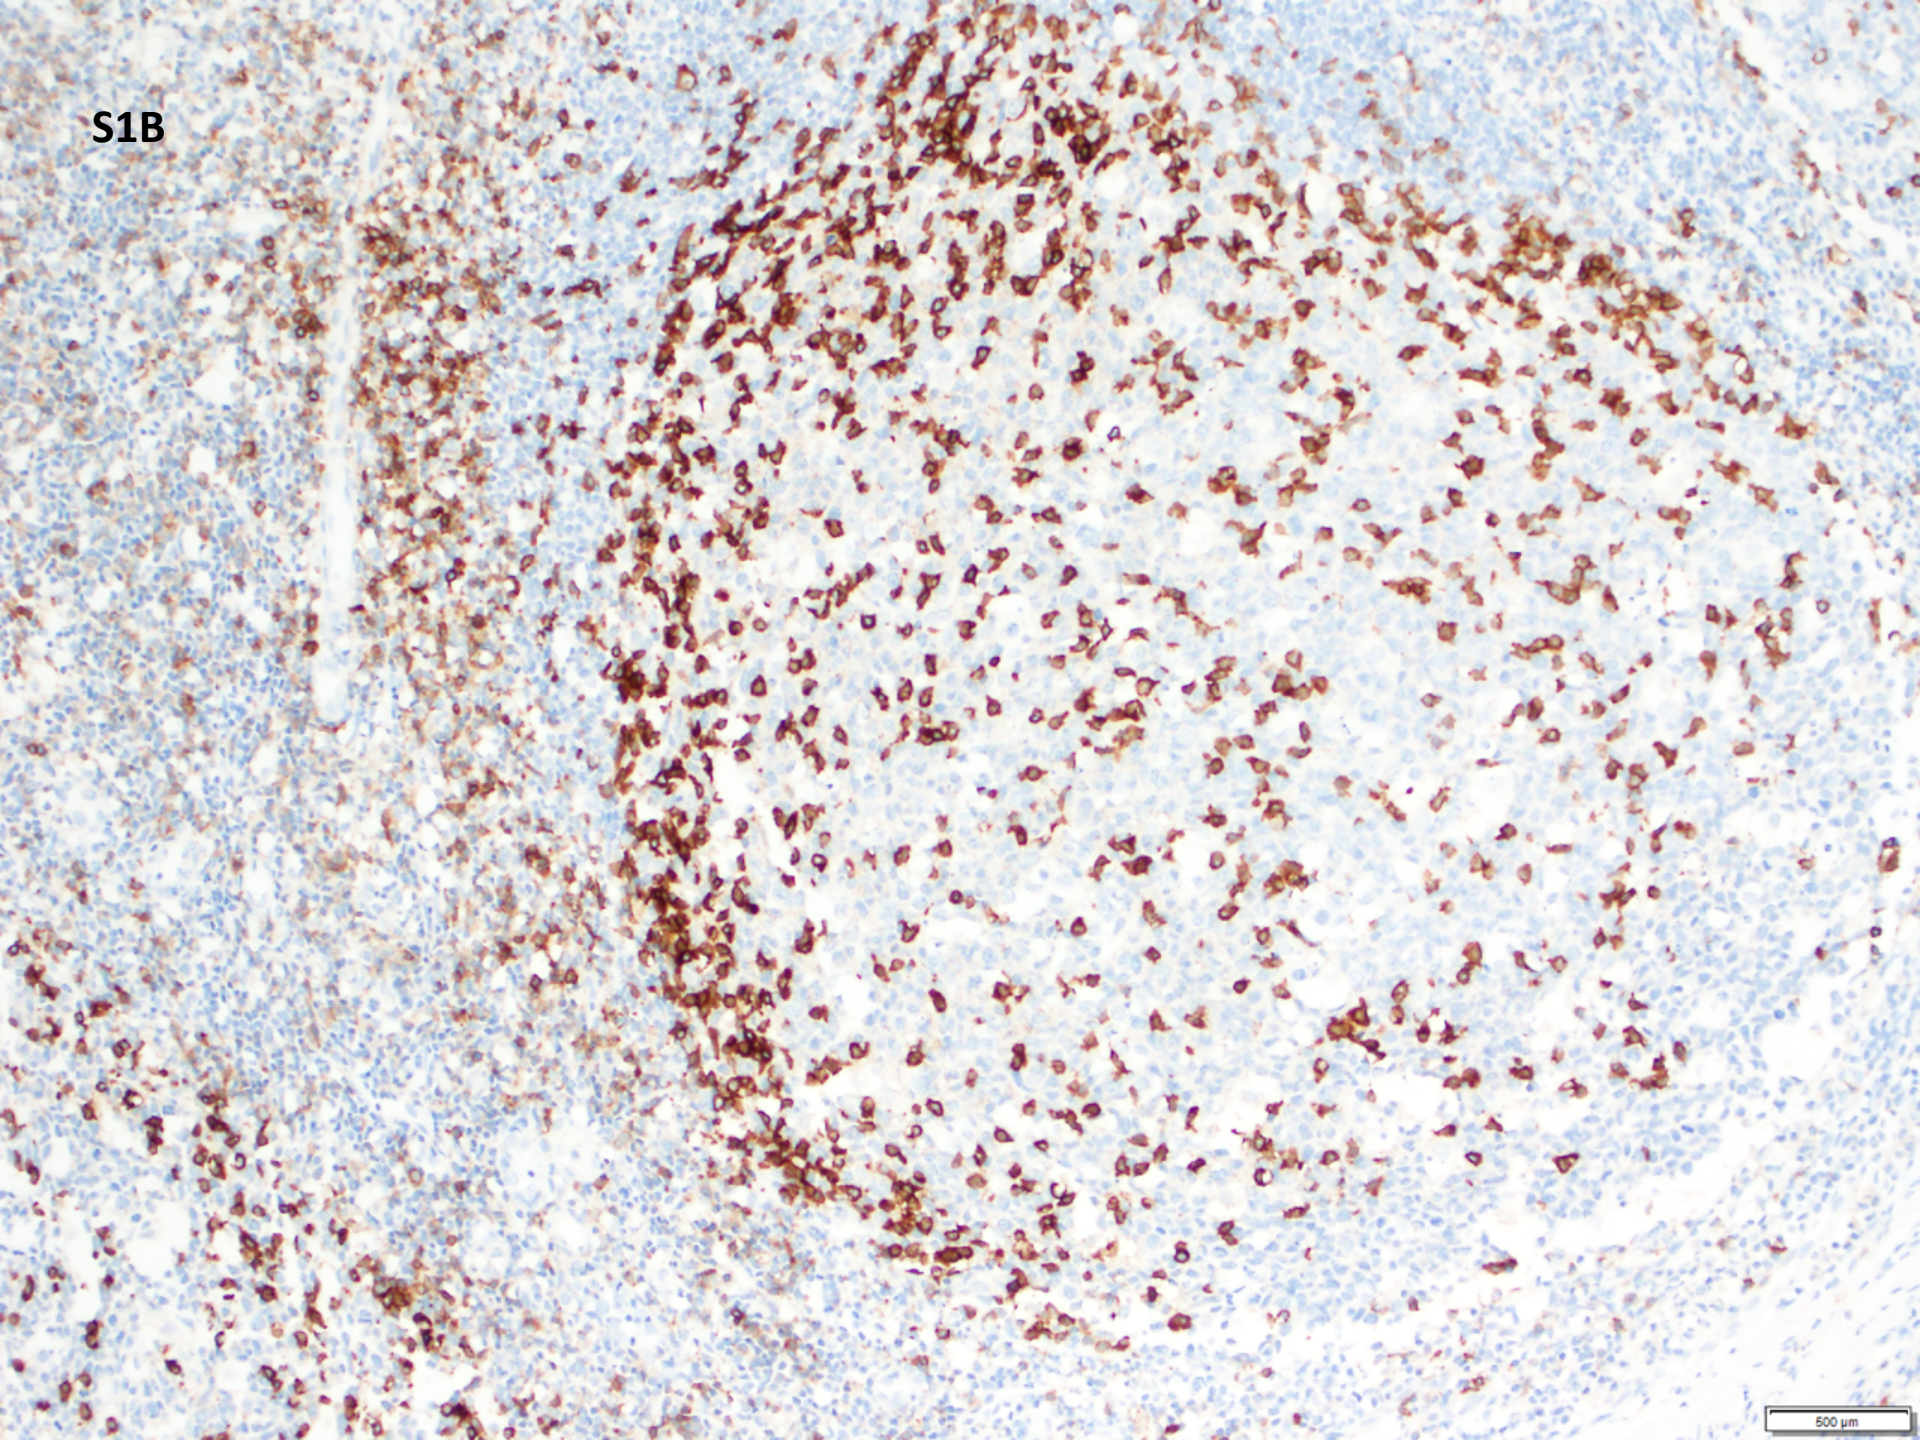

Figure S2

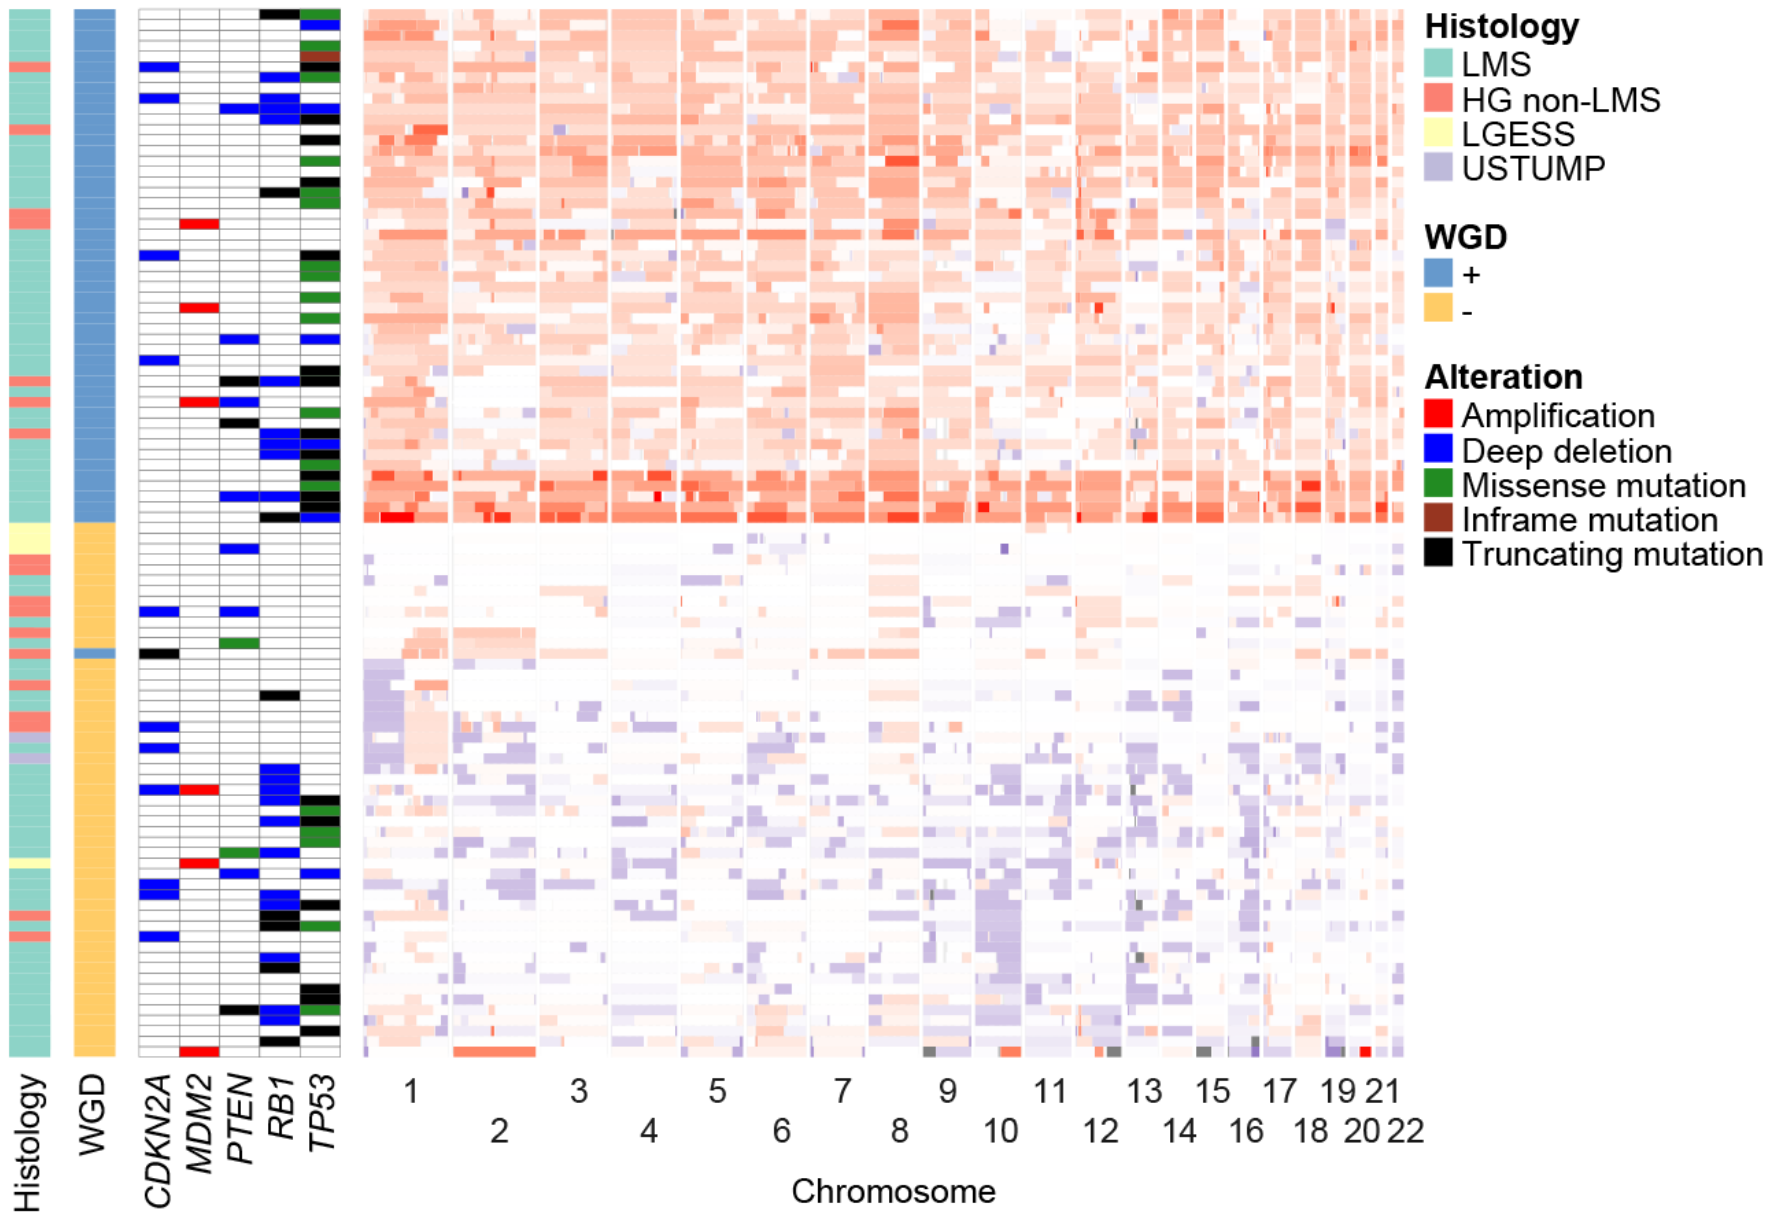

# Figure S3

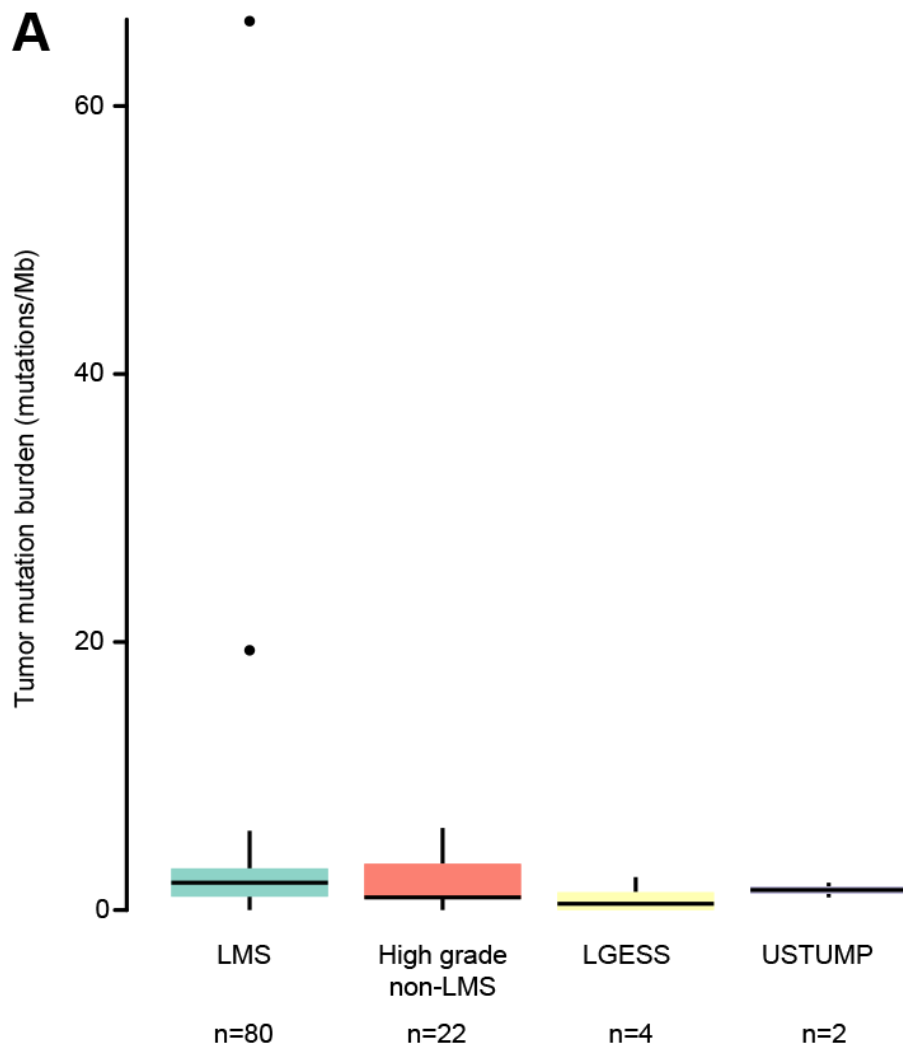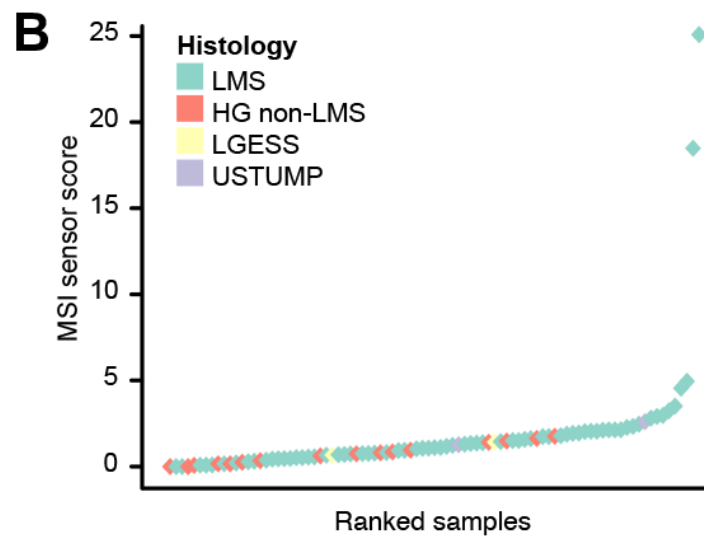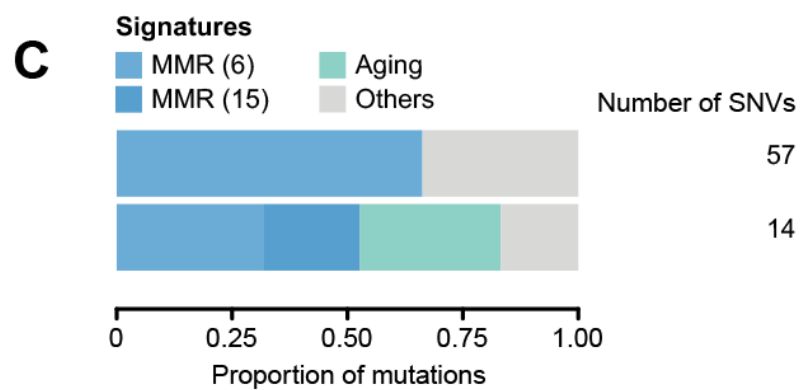

Supplement: NIHMS1585617-supplement-2.pdf [file NIHMS1585617-supplement-2.pdf]
